# Supplementary material
Source: Research Square preprint supplement (doi:10.21203/rs.3.rs-9348933/v1)
Supplement: Supplementary file 1 [file 14cc42db98488365c0ac145a.docx]

**Supplemental table 2. Univariable analysis comparison of factors associated with endovascular treatment cohort**

| **Group of treatment** | **Recurrence** | | **P-value** | **Reintervention** | | **P-value** |
| --- | --- | --- | --- | --- | --- | --- |
|  | **Yes n=21 (%)** ±**SD** | **No n=121 (%)** ±**SD** |  | **Yes n=20 (%)** ±**SD** | **No n=122 (%)** ±**SD** |  |
| **Moment of the embolization** | | | | | | |
| **Previous the Surgery** | 6 (28.57) | 20 (16.52) | 0.333 | 6 (30) | 22 (18.03) | 0.100 |
| **After the Surgery** | 9 (42.86) | 70 (58.85) | 7 (35) | 70 (57.37) |
| **Only embolization** | 6 (28.57) | 31 (25.61) | 7 (35) | 32 (26.22) |
| **Vascular access route** | | | | | | |
| Femoral | 21 (100) | 111 (91.74) | 0.172 | 20 (100) | 112 (91.80) | 0.184 |
| Radial | 0 (0) | 10 (8.26) | 0 (0) | 10 (8.20) |
| **Embolic material** | | | | | | |
| **Coils** | 3 (14.28) | 8 (6.61) | 0.258 | 3 (15) | 8 (6.61) | **0.026** |
| **Onyx** | 10 (47.61) | 42 (34.71) | 12 (60) | 41 (25,40) |
| **Cyanoacrylate** | 2 (9.52) | 29 (29.96) | 0 (0) | 31 (25.62) |
| **Microparticles** | 1 (4.76) | 26 (21.48) | 1 (5) | 25 (20.49) |
| **Phill** | 1 (4.76) | 5 (4.13) | 0 (0) | 6 (4.96) |
| **Squid** | 4 (19.04) | 4 (19.05) | 4 (20) | 8 (6.61) |
| **Menox** | 0 (0) | 1 (0.82) | 0 (0) | 1 (0.83) |
| **Phill + Cyanoacrylate** | 0 (0) | 2 (1.65) | 0 (0) | 1 (0.83) |
| **Embolic material subtype** | | | | | | |
| **Coils** | 3 (14.28) | 8 (6.61) | 0.072 | 3 (15) | 8 (6.61) | 0.138 |
| **Microparticles** | 1 (4.76) | 26 (21.48) | 1 (5) | 25 (20.49) |
| **Liquid** | 17 (80.95) | 83 (68.59) | 16 (20) | 88 (72.13) |
| **Catheter position before embolization** | | | | | | |
| **Origin of the MMA** | 7 (33.33) | 40 (33.05) | 0.298 | 8 (40) | 39 (31.96) | 0.192 |
| **Anterior division of the MMA** | 6 (28.57) | 21 (17.35) | 6 (30) | 21 (17.21) |
| **Posterior division of the MMA** | 3 (14.28) | 14 (11.57) | 2 (10) | 14 (11.47) |
| **Anterior + posterior divisions of the MMA** | 5 (23.80) | 46 (38.01) | 4 (20) | 47 (38.52) |
