# Supplementary material
Source: Research Square preprint supplement (doi:10.21203/rs.3.rs-9348933/v1)
Supplement: Supplementary file 2 [file 530e338d90be73042908e420.docx]

**Supplemental table 1. Univariate analysis comparison of factors related with surgery treatment cohort**

| **Group of treatment** | **Recurrence** | | **P-value** | **Reintervention** | | **P-value** |
| --- | --- | --- | --- | --- | --- | --- |
|  | **Yes n=45 (%)** ±**SD** | **No n= 155 (%)** ±**SD** |  | **Yes n= 39 (%)** ±**SD** | **No n= 161 (%)** ±**SD** |  |
| **Type of surgery** | | | | | | |
| **Craniotomy** | 27 (60) | 85 (54.3) | 0.353 | 22 (56.41) | 90 (55.9) | 0.061 |
| **Single burr hole trephination** | 15 (33.3) | 58 (37.4) | 6 (15.38) | 7 (4.32) |
| **Double burr hole trephination** | 3 (6.6) | 12 (7.69) | 3 (20) | 12 (7.41) |
| **Postoperative drainage catheter (yes)** | 27 (60) | 99 (63.8) | 0.819 | 21 (56.76) | 100 (62.11) | 0.516 |
| **Postoperative days of drainage catheter (mean)** | 1.73±0.27 | 2.39±0.21 | 0.517 | 2.6±0.793 | 2.16±0.129 | 0.517 |
| **Post-drainage pneumocephalus (yes)** | 26 (57.7) | 48 (30.9) | **0.001** | 22 (66.67) | 52 (34.67) | **0.001** |
